# Supplementary material for: Mutant huntingtin messenger RNA forms neuronal nuclear clusters in rodent and human brains
Source: PubMed Central journal article supplement (PMC9707646; doi:10.1093/braincomms/fcac248), 2022-10-13
Supplement: fcac248_supplementary_data.pdf [file fcac248_supplementary_data.pdf]

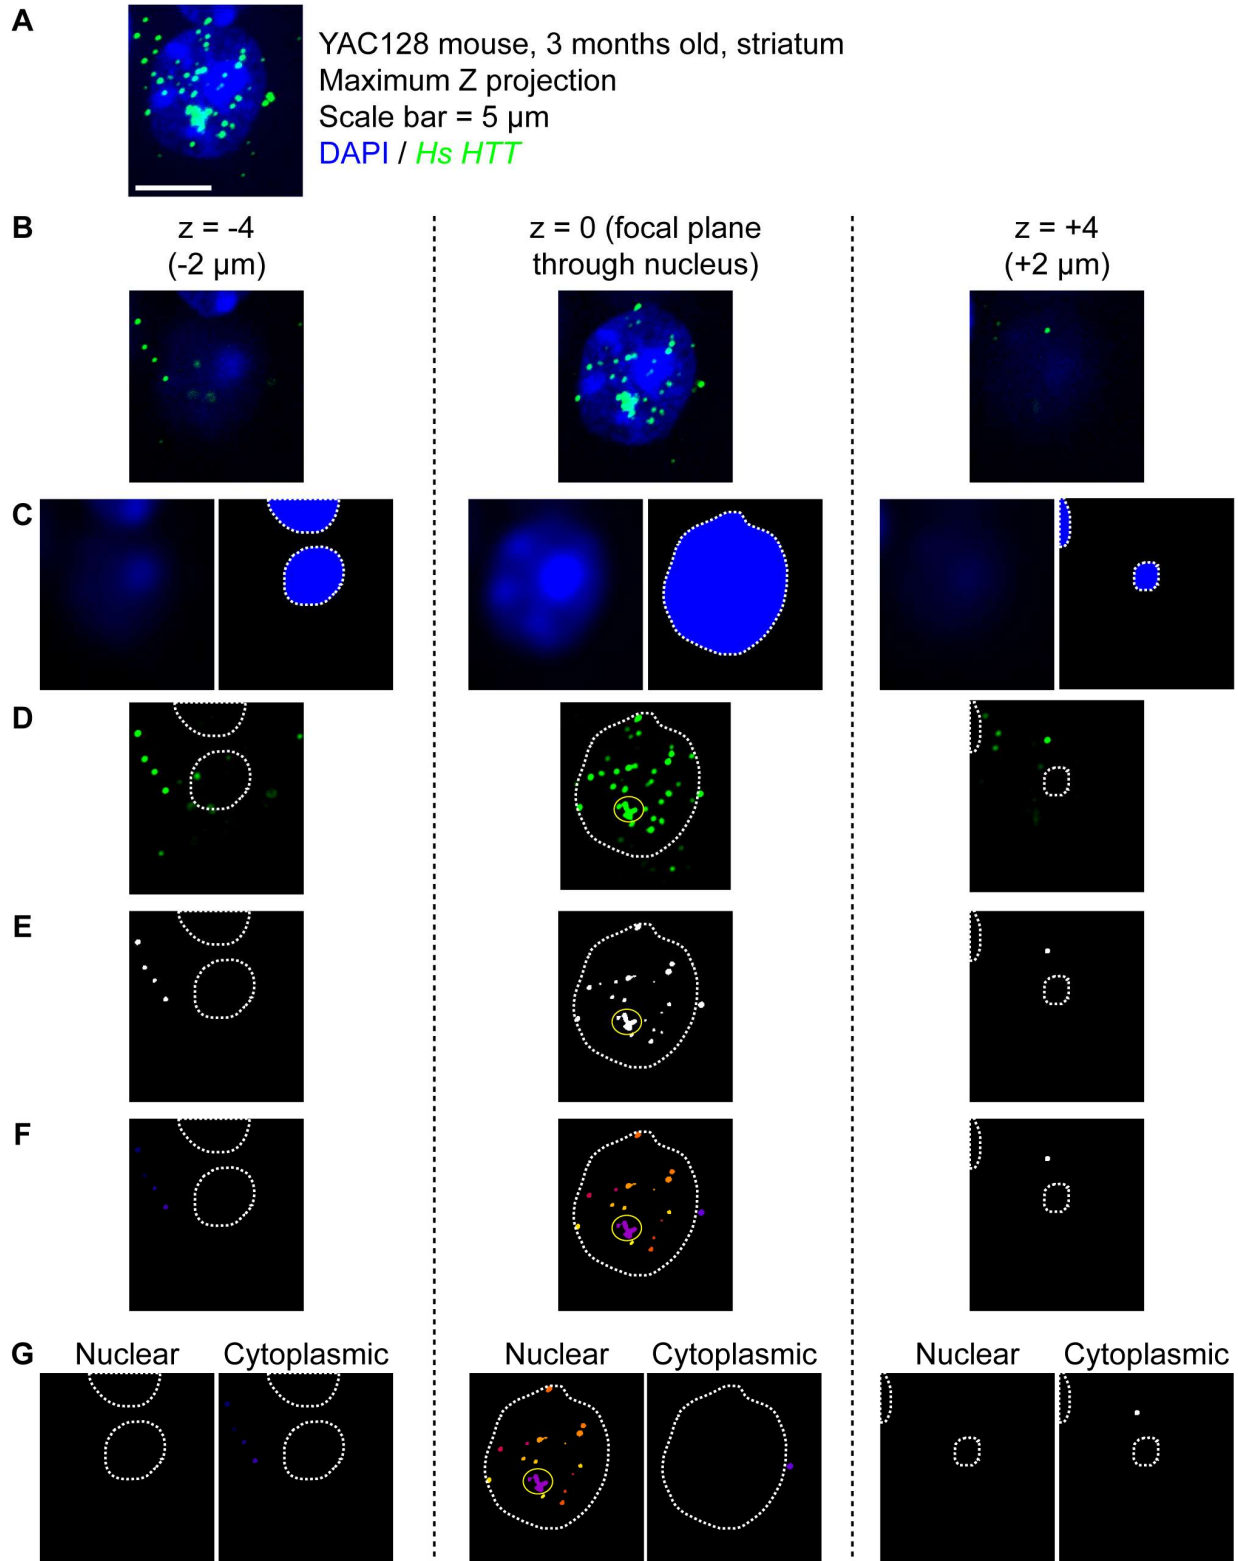

**Supplementary Figure 1. Image processing for quantification of nuclear vs. cytoplasmic foci and volumes. Related to Figure 1.**

**(A)** Maximum Z projection of a raw image stack (see Methods for image acquisition details). Image analysis was performed in 3D. For simplicity, only one RNAscope probe is shown (*Hs HTT*, green), but all RNAscope channels were processed identically. **(B)** Three individual planes of the image stack shown side-by-side as a comparison. **(C)** (Left) DAPI channel convolved with a Gaussian blur ( $\sigma = 10$  pixels) and then (right) thresholded using the “Default” method in ImageJ v1.53c (stack histogram enabled). The resulting nucleus is outlined with a white dashed line and overlaid in all subsequent steps. **(D)** Difference of Gaussians filter ( $\sigma_1 = 2$  pixels,  $\sigma_2 = 4$  pixels) on the green RNAscope channel in (B). Yellow circle is outlining a cluster. **(E)** Thresholded image of (D) using the minimum intensity value calculated from either the Otsu threshold or a manual threshold (250 intensity). **(F)** 3D Objects Counter of (E) (minimum size = 25 voxels) with different colors representing discrete, contiguous objects that were detected. **(G)** Overlay of (F) with the nuclear mask in (C) to determine nuclear or cytoplasmic localization of RNAscope foci.

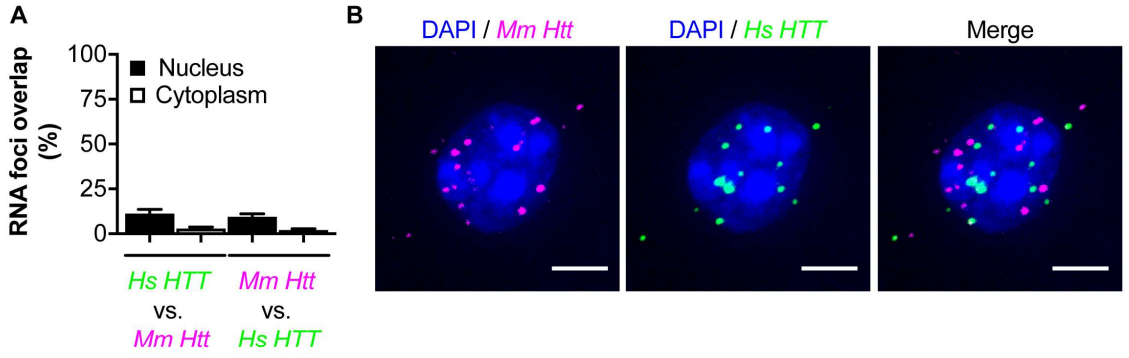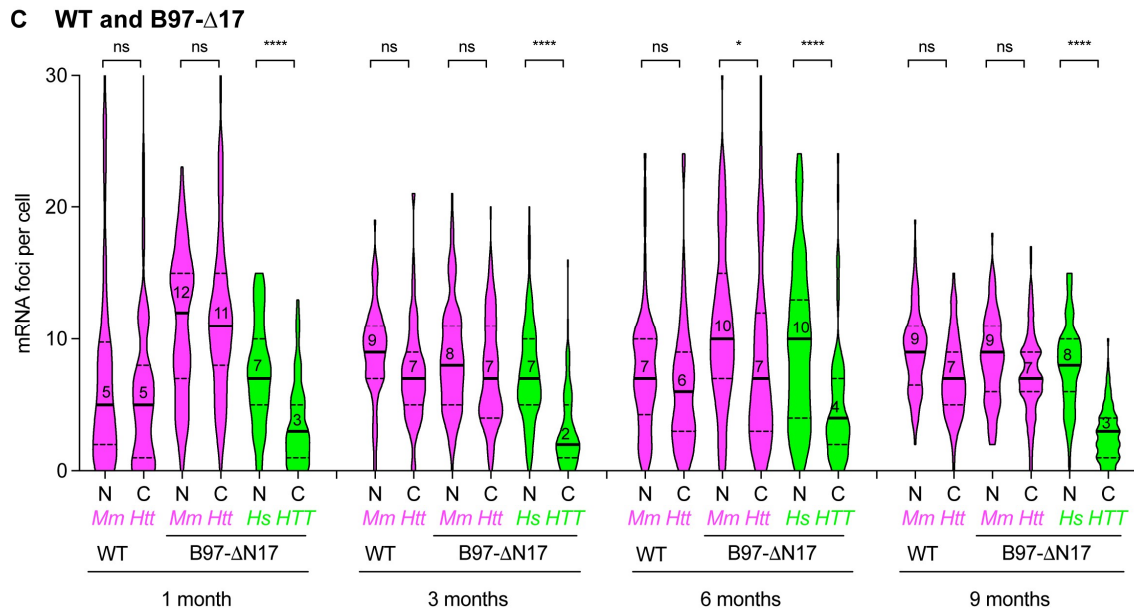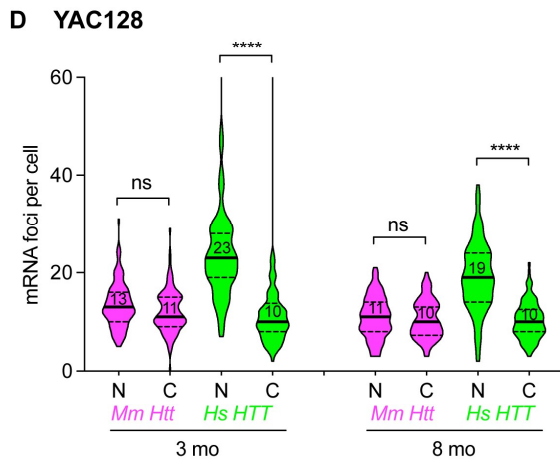

**Supplementary Figure 2. Validation of *Mm Htt* and *Hs HTT* mRNAs detection by multiplexed dual-color FISH labeling. Related to Figure 1, 2, and 3.**

(A) Co-localization of *Hs HTT* (green) and *Mm Htt* (magenta) RNA in the nucleus (black bars) and cytoplasm (white bars) in B97- $\Delta$ N17 striatum. RNA foci overlap was calculated between different probe sets using ImageJ (n = 60 images pooled from three mice, 20 images per mouse; mean  $\pm$  SEM). Minimal co-localization was observed. (B) Representative FISH image used for quantitative analysis in panel A. Nuclei labeled with Hoechst (blue). Scale bar, 5  $\mu$ m. (C-D) Scatter plots representing the absolute quantification of *Mm Htt* (magenta) and *Hs HTT* (green) mRNA foci in the nucleus and the cytoplasm in (C) wild-type (WT), B97- $\Delta$ N17 mice and (D) YAC128 mice. For panels C and D, n = 3 mice per group and at least 30 images were acquired per mouse and pooled for quantitative analysis. ns = not significant, \* P < 0.05, \*\* P < 0.01, \*\*\* P < 0.001, \*\*\*\* P < 0.0001, one-way ANOVA with Dunn's multiple comparisons test (F(23, 2087) = 22.31).

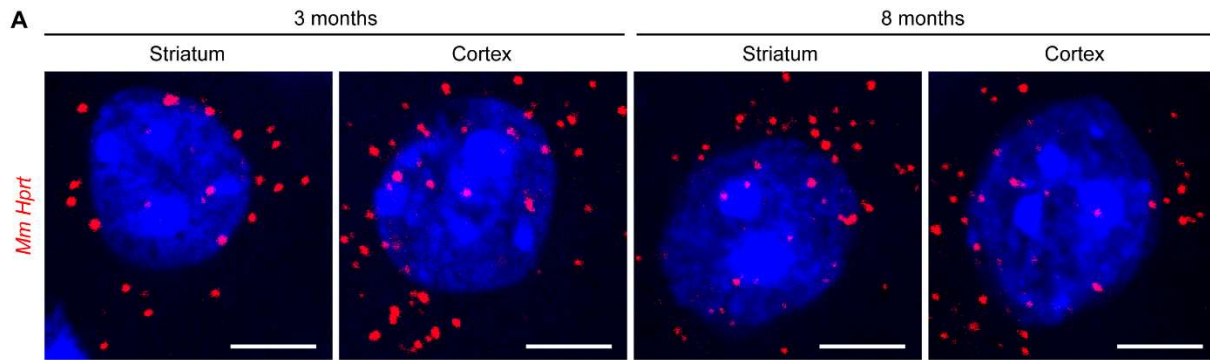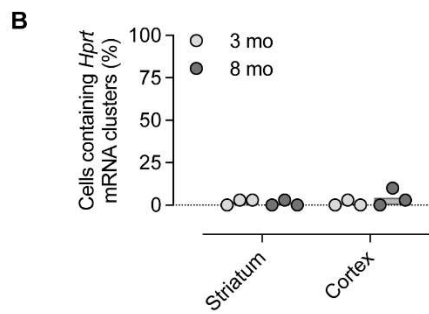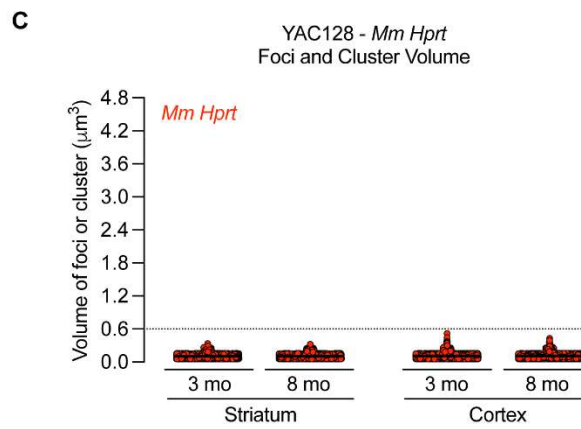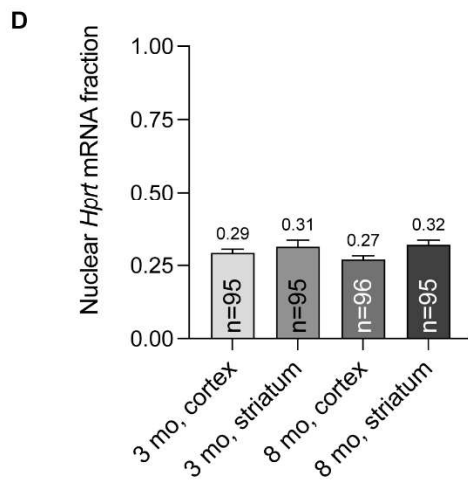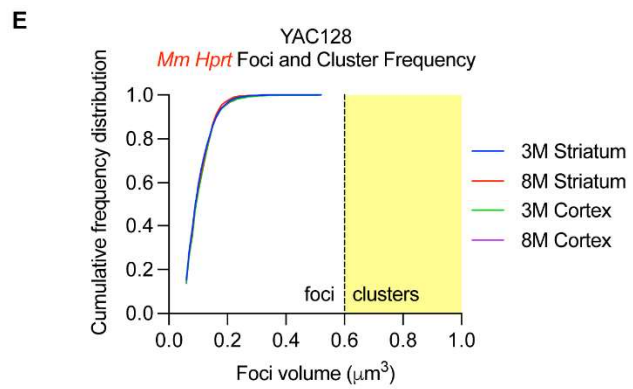

**Supplementary Figure 3. *Mm Hprt* mRNA is mostly cytoplasmic and does not form clusters in YAC128 striatum and cortex. Related to Figure 2.**

(A) *Mm Hprt* (red) mRNA in YAC128 mouse striatum and cortex detected by FISH. Nuclei labeled with Hoechst (blue). Representative images of maximum Z-projections. Scale bar, 5  $\mu\text{m}$ . (B) Percentage of cells containing *Mm Hprt* mRNA clusters. Each point represents a mouse (n = ~100 cells pooled from 3 mice). (C) Scatter plots representing the volume ( $\mu\text{m}^3$ ) of individual foci at 3 and 8 months in the striatum and cortex. Each dot represents an individual foci (n = ~100 cells pooled from 3 mice). (D) Nuclear percentage of *Mm Hprt* mRNA foci (mean  $\pm$  SD, n = 3 biological replicates). (E) Cumulative frequency distribution plot of RNA foci volume. Yellow shaded area represents the cut-off for a cluster, which is defined to be at least 0.6  $\mu\text{m}^3$ . M = months old.

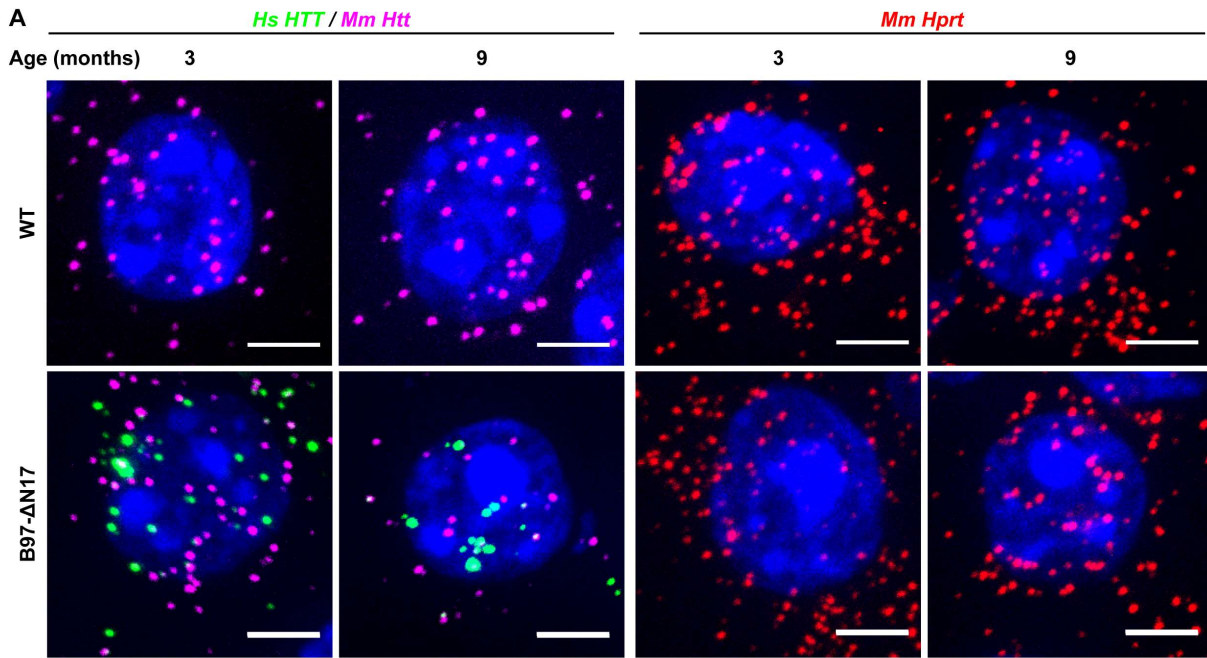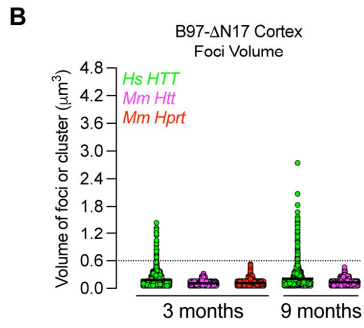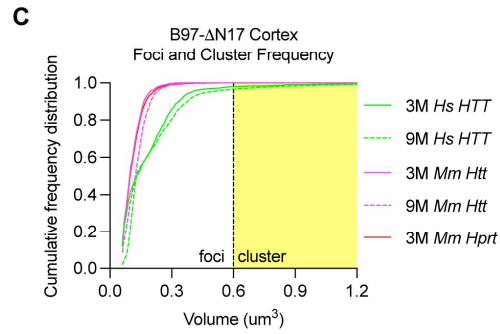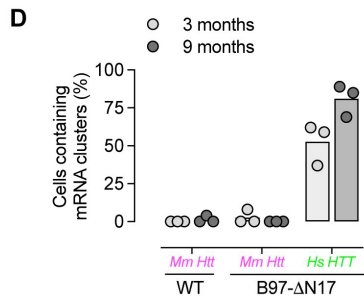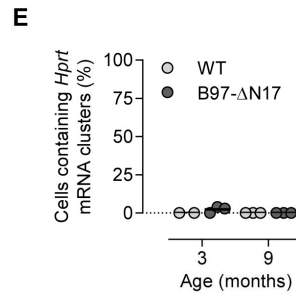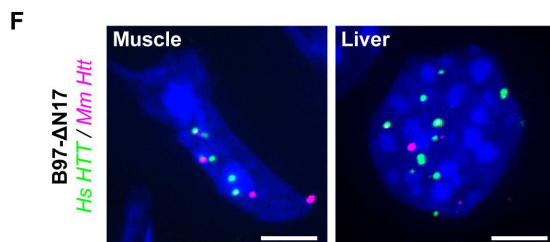

**Supplementary Figure 4. Repeat-expanded *HTT* mRNA forms nuclear clusters in B97-ΔN17 mouse cortex. Related to Figure 3.**

(A) *Hs HTT* (green), *Mm Htt* (magenta) and *Mm Hprt* (red) mRNAs detected in wild-type (WT, upper panel) and B97-ΔN17 (lower panel) mouse cortex by FISH. Nuclei labeled with Hoechst (blue). Representative images of maximum Z-projections through the nucleus. Scale bar, 5 μm. (B) Scatter plot showing the volume of individual mRNA foci or cluster (see Methods for how volume was calculated). (C) Cumulative frequency distribution plot of RNA foci volume. Yellow shaded area represents the cut-off for a cluster, which is defined to be at least 0.6 μm<sup>3</sup>. M = months old. Thick line represents the mean. (D, E) Percentage of cells containing *Mm Htt*, *Hs HTT* or *Mm Hprt* mRNA clusters in WT and B97-ΔN17 mouse cortex (n = ~100 cells per brain region pooled from 2-3 mice, each point represents a mouse). For all panels, ns = not significant, \*\* P < 0.01, \*\*\* P < 0.001, \*\*\*\* P < 0.0001, one-way ANOVA, Bonferroni's multiple comparisons test. (F) *Hs HTT* (green) and *Mm Htt* (magenta) mRNAs detected in B97-ΔN17 mouse muscle and liver by FISH. Nuclei labeled with Hoechst (blue). Representative images of maximum Z-projections. Scale bar, 5 μm.



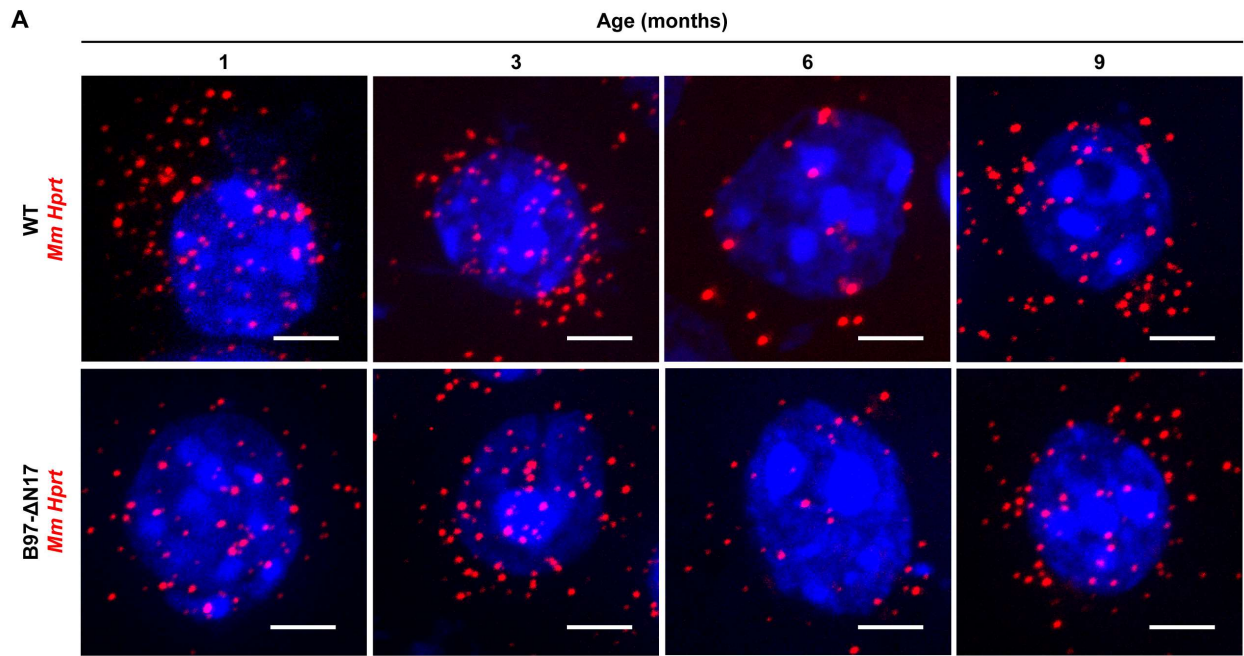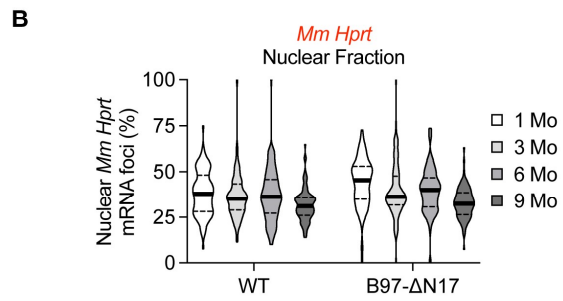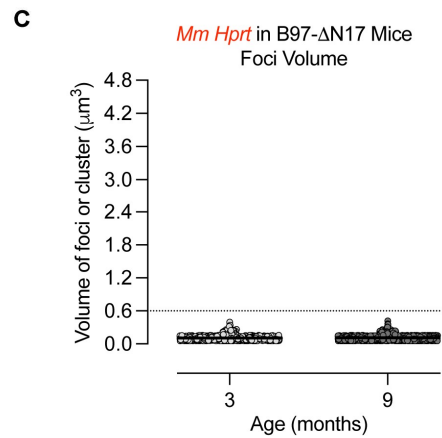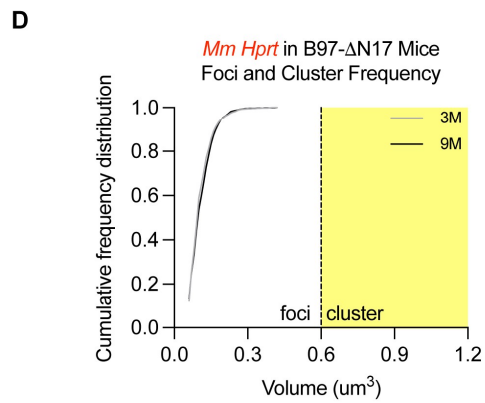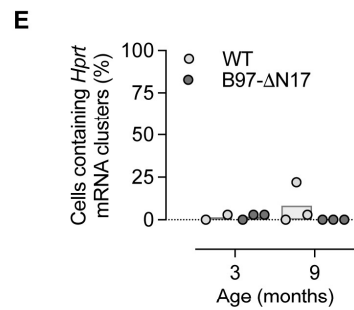

**Supplementary Figure 5. *Mm Hprt* mRNA is mostly cytoplasmic and does not form clusters in B97- $\Delta$ N17 mouse striatum. Related to Figure 3.**

(A) *Mm Hprt* mRNA (red) detected in the striatum of wild-type (WT) and B97- $\Delta$ N17 mice by FISH. Nuclei labeled with Hoechst (blue). Representative images of maximum Z-projections. Scale bar, 5  $\mu$ m. (B) Percentage of nuclear *Hprt* mRNA in wild-type (WT) and B97- $\Delta$ N17 mice at 1, 3, 6 and 9 months (n = ~100 cells pooled from 3 mice). (C) Scatter plot showing the volume of individual mRNA foci or cluster (see Methods for how volume was calculated). Thick line represents the mean. (D) Cumulative frequency distribution plot of RNA foci volume. Yellow shaded area represents the cut-off for a cluster, which is defined to be at least 0.6  $\mu$ m<sup>3</sup>. M = months old. (E) Percentage of cells containing *Mm Hprt* mRNA clusters in WT and B97- $\Delta$ N17 mouse striatum (n = ~100 cells per brain region pooled from 3 mice, each point represents a mouse). For all panels, ns = not significant, \*\* P < 0.01, \*\*\* P < 0.001, \*\*\*\* P < 0.0001, one-way ANOVA, Bonferroni's multiple comparisons test.

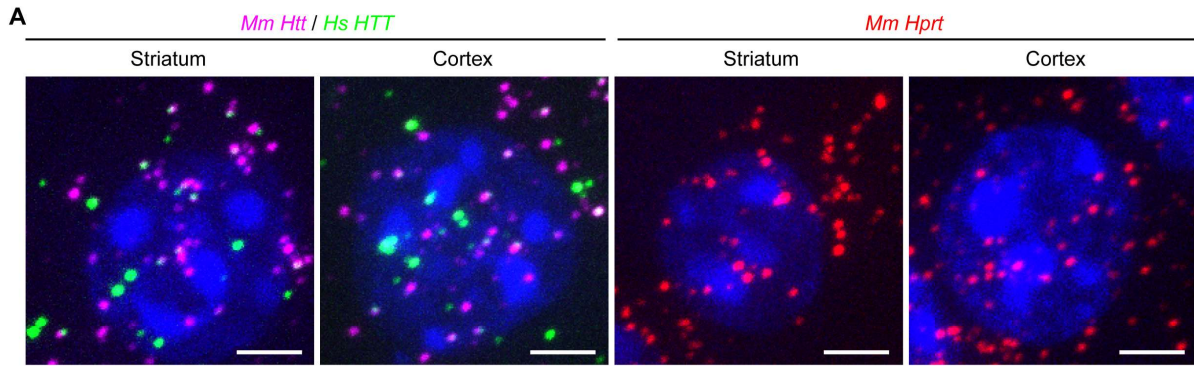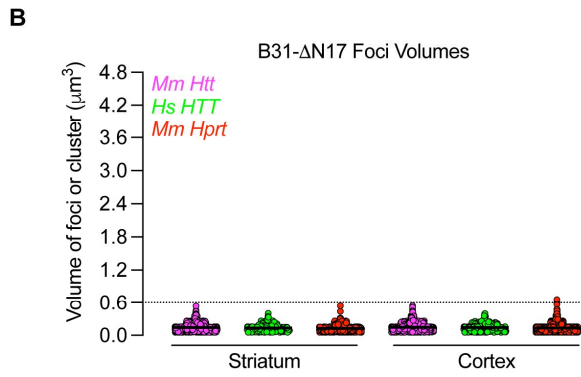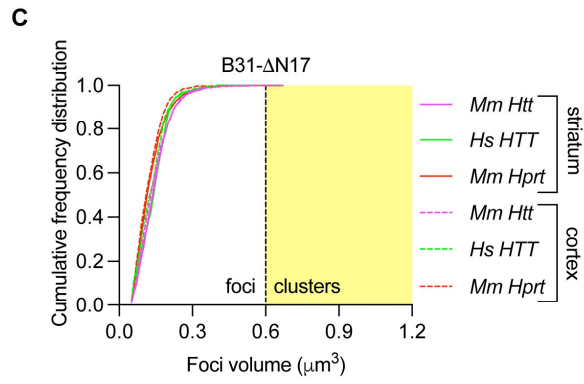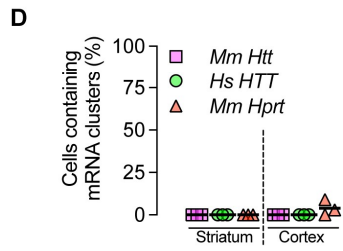

**Supplementary Figure 6. Nuclear and cytoplasmic distribution of wild-type *Mm Htt* (7 CAG), *Hs HTT* (31 CAG) and *Mm Hprt* in B31-ΔN17 (4 months old) mouse striatum and cortex. Related to Figure 3.**

**(A)** FISH performed on B31-ΔN17 (4 months old) mouse striatum and cortex. Nuclei stained with Hoechst (blue). Representative images are maximum Z projections through the nucleus region spaced 0.5 μm apart. Scale bar, 5 μm. **(B)** Scatter plot showing the volume of individual mRNA foci or cluster (see Methods for how volume was calculated). Thick line represents the mean. **(C)** Cumulative frequency distribution plot of RNA foci volume. Yellow shaded area represents the cut-off for a cluster, which is defined to be at least 0.6 μm<sup>3</sup>. M = months old. **(D)** Percentage of cells containing mRNA clusters in B31-ΔN17 mouse striatum and cortex (n = ~100 cells per brain region pooled from 3 mice, each point represents a mouse).

DAPI / *Mm Htt* / *Hs HTT* / Scale bar = 5  $\mu$ m

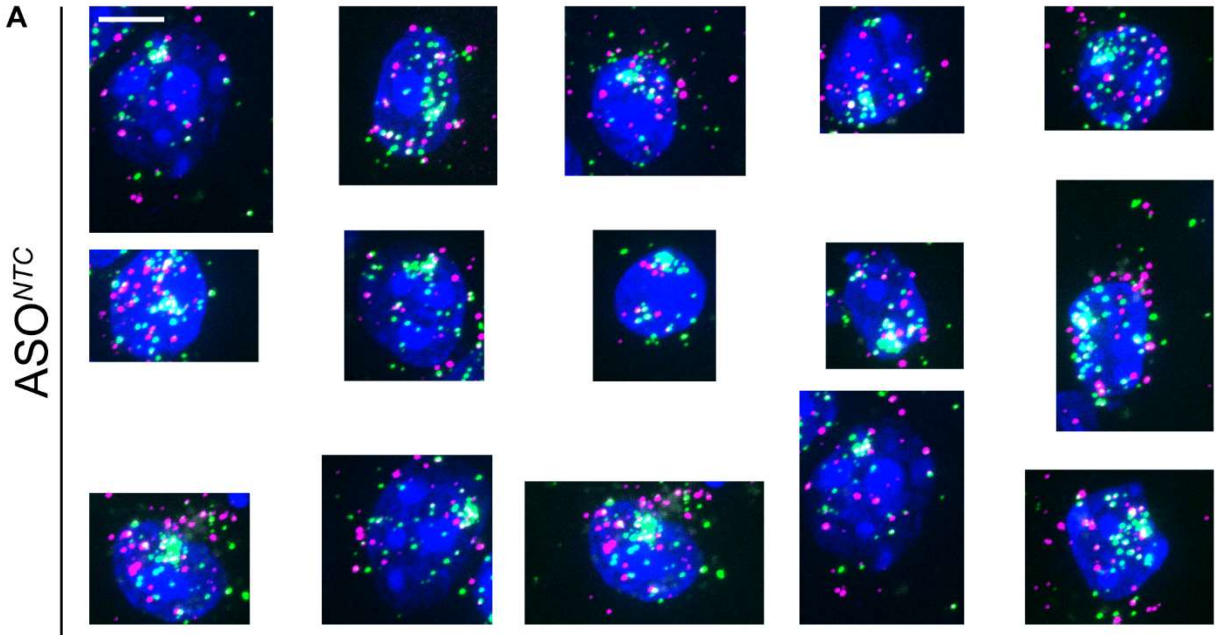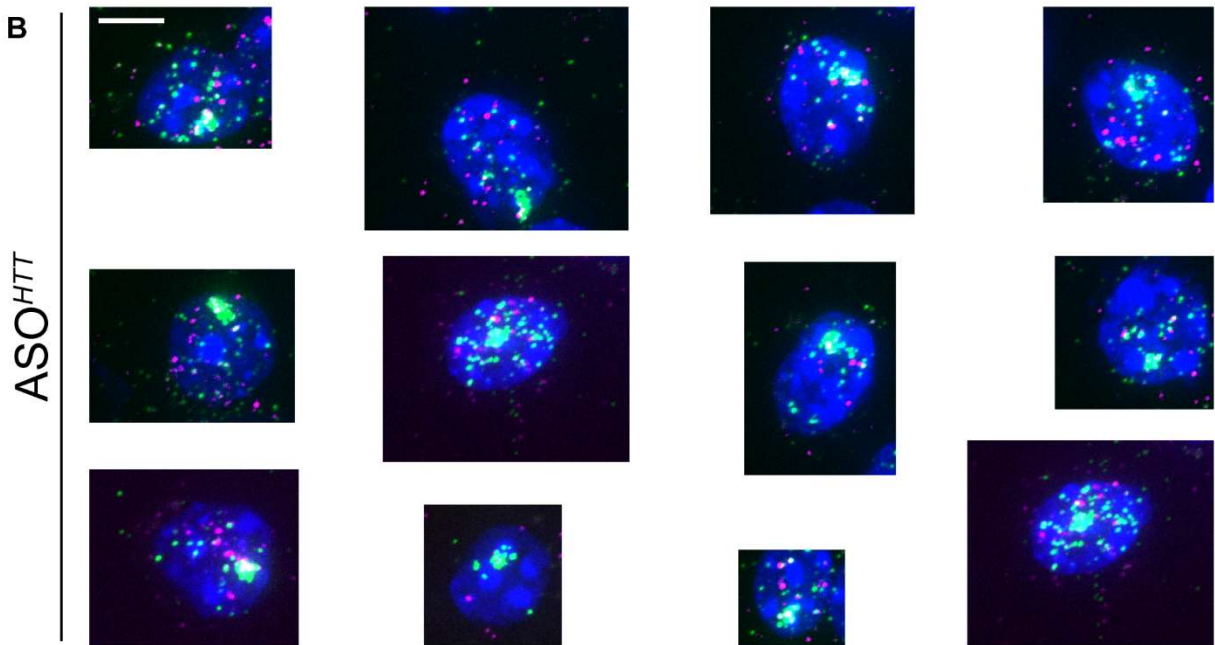

**Supplementary Figure 7: Mutant *Hs HTT*, but not wild-type *Mm Htt*, clusters are easily detectable in YAC128 (3 months old) striatum. Related to Figure 2, 3, and 6.**

Wild-type *Mm Htt* (magenta) and mutant *Hs HTT* (green) were detected in YAC128 (3 months old) mouse striatum. A random panel of images is shown for (A) ASO<sup>N<sup>TC</sup></sup>-treated mice and (B) ASO<sup>HTT</sup>-treated mice. Representative images are maximum Z-projections through the nucleus spaced 0.5 μm apart. Nuclei stained with DAPI (blue). Scale bar, 5 μm. Nuclear clusters are resistant to ASO treatment.

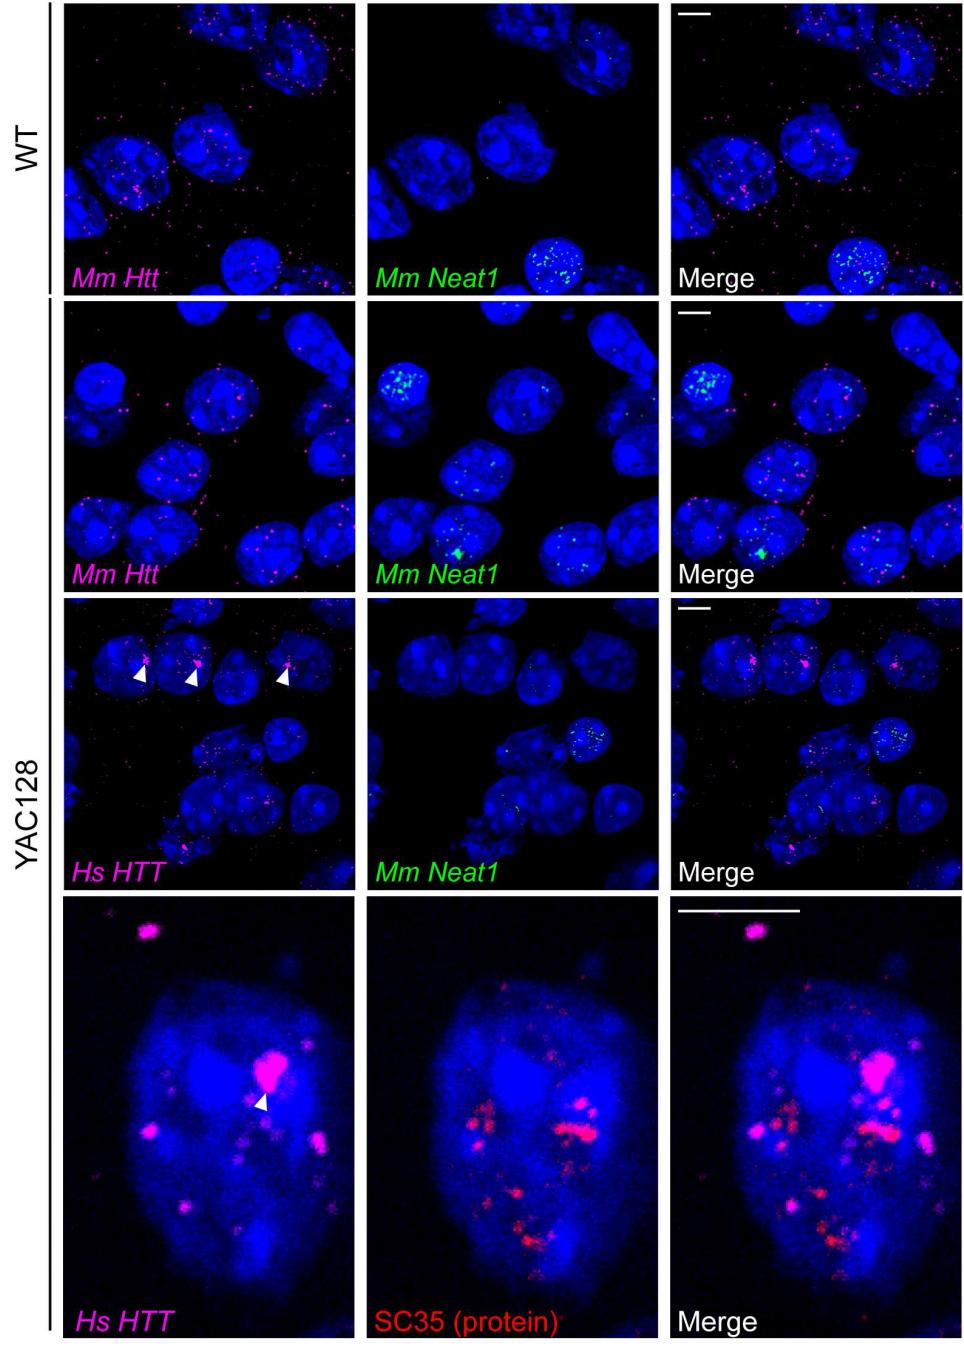

**Supplementary Figure 8. Nuclear *Hs HTT* mRNA clusters do not co-localize with the paraspeckle markers *Mm Neat1* (lncRNA) or SC-35 (protein). Related to Figure 4.**

RNAscope was performed in WT and YAC128 mouse brain (3 months old). Cells highly expressing the paraspeckle marker *Mm Neat1* were not the same population of cells highly expressing *Hs HTT* containing clusters. Arrowheads indicate *Hs HTT* clusters. Scale bar, 5  $\mu$ m.



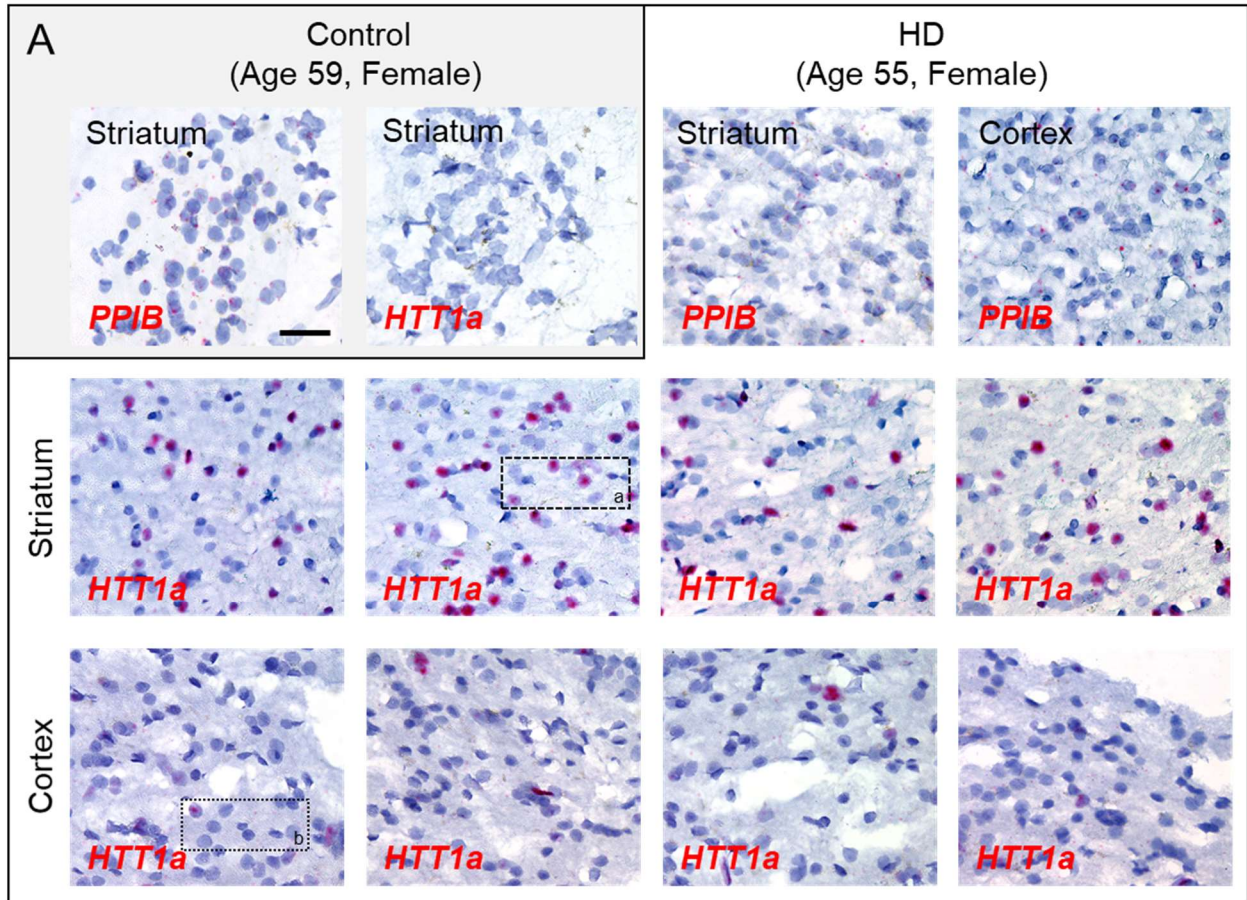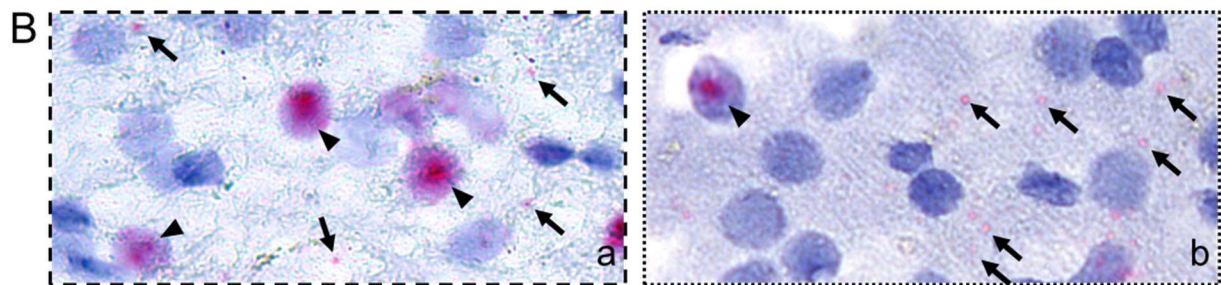

**Supplementary Figure 9. *Hs HTT1a* forms clusters in post-mortem HD brain and are detectable in the cytoplasm as foci**

Chromogenic RNAscope assay was performed in healthy control and HD post-mortem human brains and counterstained with hematoxylin. (A) In the HD brain, four different fields view in the striatum and cortex using the *HTT1a* probe are shown to illustrate the variability in different subregions of the brain. Scale bars, 20  $\mu\text{m}$ . (B) Insets of (a) HD striatum and (b) cortex from panel A. Arrowheads indicate *HTT1a* clusters and arrows indicate cytoplasmic *HTT1a* foci.

## SUPPLEMENTARY TABLES

| HD Model                | Model Type | Human region inserted                  | Repeat length                          | Age of Phenotype | Other notable features                                                  | Citation                             |
|-------------------------|------------|----------------------------------------|----------------------------------------|------------------|-------------------------------------------------------------------------|--------------------------------------|
| BACHD- $\Delta$ N17-97Q | Transgene  | Full CAG-expanded <i>HTT</i> transgene | 97 mixed CAG/CAA                       | ~6 months        | BACHD- $\Delta$ N17-31Q (control); 51 nucleotide deletion in N-terminal | (Gray et al., 2008; Gu et al., 2015) |
| YAC128                  | Transgene  | Full CAG-expanded <i>HTT</i> transgene | 128 mostly pure CAG (82 uninterrupted) | ~6 months        |                                                                         | (Slow et al., 2003)                  |

**Supplementary Table 1: Summary of mouse models. Related to Figure 1.**

| Name               | Sequence 5'-3'                        | Reference                                |
|--------------------|---------------------------------------|------------------------------------------|
| ASO <sup>NTC</sup> | +A#+A#+C#A#C#G#T#C#T#A#T#A#C#+G#+C    |                                          |
| ASO <sup>HTT</sup> | #+A#+G#+C#A#T#C#C#A#A#A#T#G#T#+G#+A#G | (Didiot et al., 2018; Hung et al., 2015) |

**Supplementary Table 2. Hydrophobically modified ASO sequences and modifications. #, phosphorothioate; +, locked nucleic acid. Related to Figure 6 and Figure S7.**

| Species | Target RNA        | ACDBio product # |
|---------|-------------------|------------------|
| Mouse   | <i>Htt</i>        | 473001           |
| Mouse   | <i>Hprt</i>       | 312951           |
| Mouse   | <i>Neat1</i>      | 440351           |
| Human   | <i>HTT</i>        | 420231           |
| Human   | <i>HTT1a</i> (5') | 561431           |
| Human   | <i>HTT1a</i> (3') | 561441           |
| Human   | <i>HTT i66</i>    | 493761           |

**Supplementary Table 3. Probe sets used for FISH experiments. Related to Figure 1.**

### SUPPLEMENTARY REFERENCES

Didiot, M.C., Ferguson, C.M., Ly, S., Coles, A.H., Smith, A.O., Bicknell, A.A., Hall, L.M., Sapp, E., Echeverria, D., Pai, A.A., *et al.* (2018). Nuclear Localization of Huntingtin mRNA Is Specific to Cells of Neuronal Origin. *Cell reports* 24, 2553-2560.e2555.

Gray, M., Shirasaki, D.I., Cepeda, C., Andre, V.M., Wilburn, B., Lu, X.H., Tao, J., Yamazaki, I., Li, S.H., Sun, Y.E., *et al.* (2008). Full-length human mutant huntingtin with a stable polyglutamine repeat can elicit progressive and selective neuropathogenesis in BACHD mice. *J Neurosci* 28, 6182-6195.

Gu, X., Cantele, J.P., Greiner, E.R., Lee, C.Y., Barth, A.M., Gao, F., Park, C.S., Zhang, Z., Sandoval-Miller, S., Zhang, R.L., *et al.* (2015). N17 Modifies mutant Huntingtin nuclear pathogenesis and severity of disease in HD BAC transgenic mice. *Neuron* 85, 726-741.

Hung, G., Leeds, J., Bennett, C.F., and Freier, S.M. (2015). Compositions and their uses directed to huntingtin (United States: Isis Pharmaceuticals, Inc., CHDI Foundation Inc.).

Slow, E.J., van Raamsdonk, J., Rogers, D., Coleman, S.H., Graham, R.K., Deng, Y., Oh, R., Bissada, N., Hossain, S.M., Yang, Y.Z., *et al.* (2003). Selective striatal neuronal loss in a YAC128 mouse model of Huntington disease. *Hum Mol Genet* 12, 1555-1567.
